# Supplementary material
Source: Springer Nature journal article supplement (https://www.springermedizin.de/resource/supplementary/12893_2013_464_MOESM3_ESM.pdf/9512494)

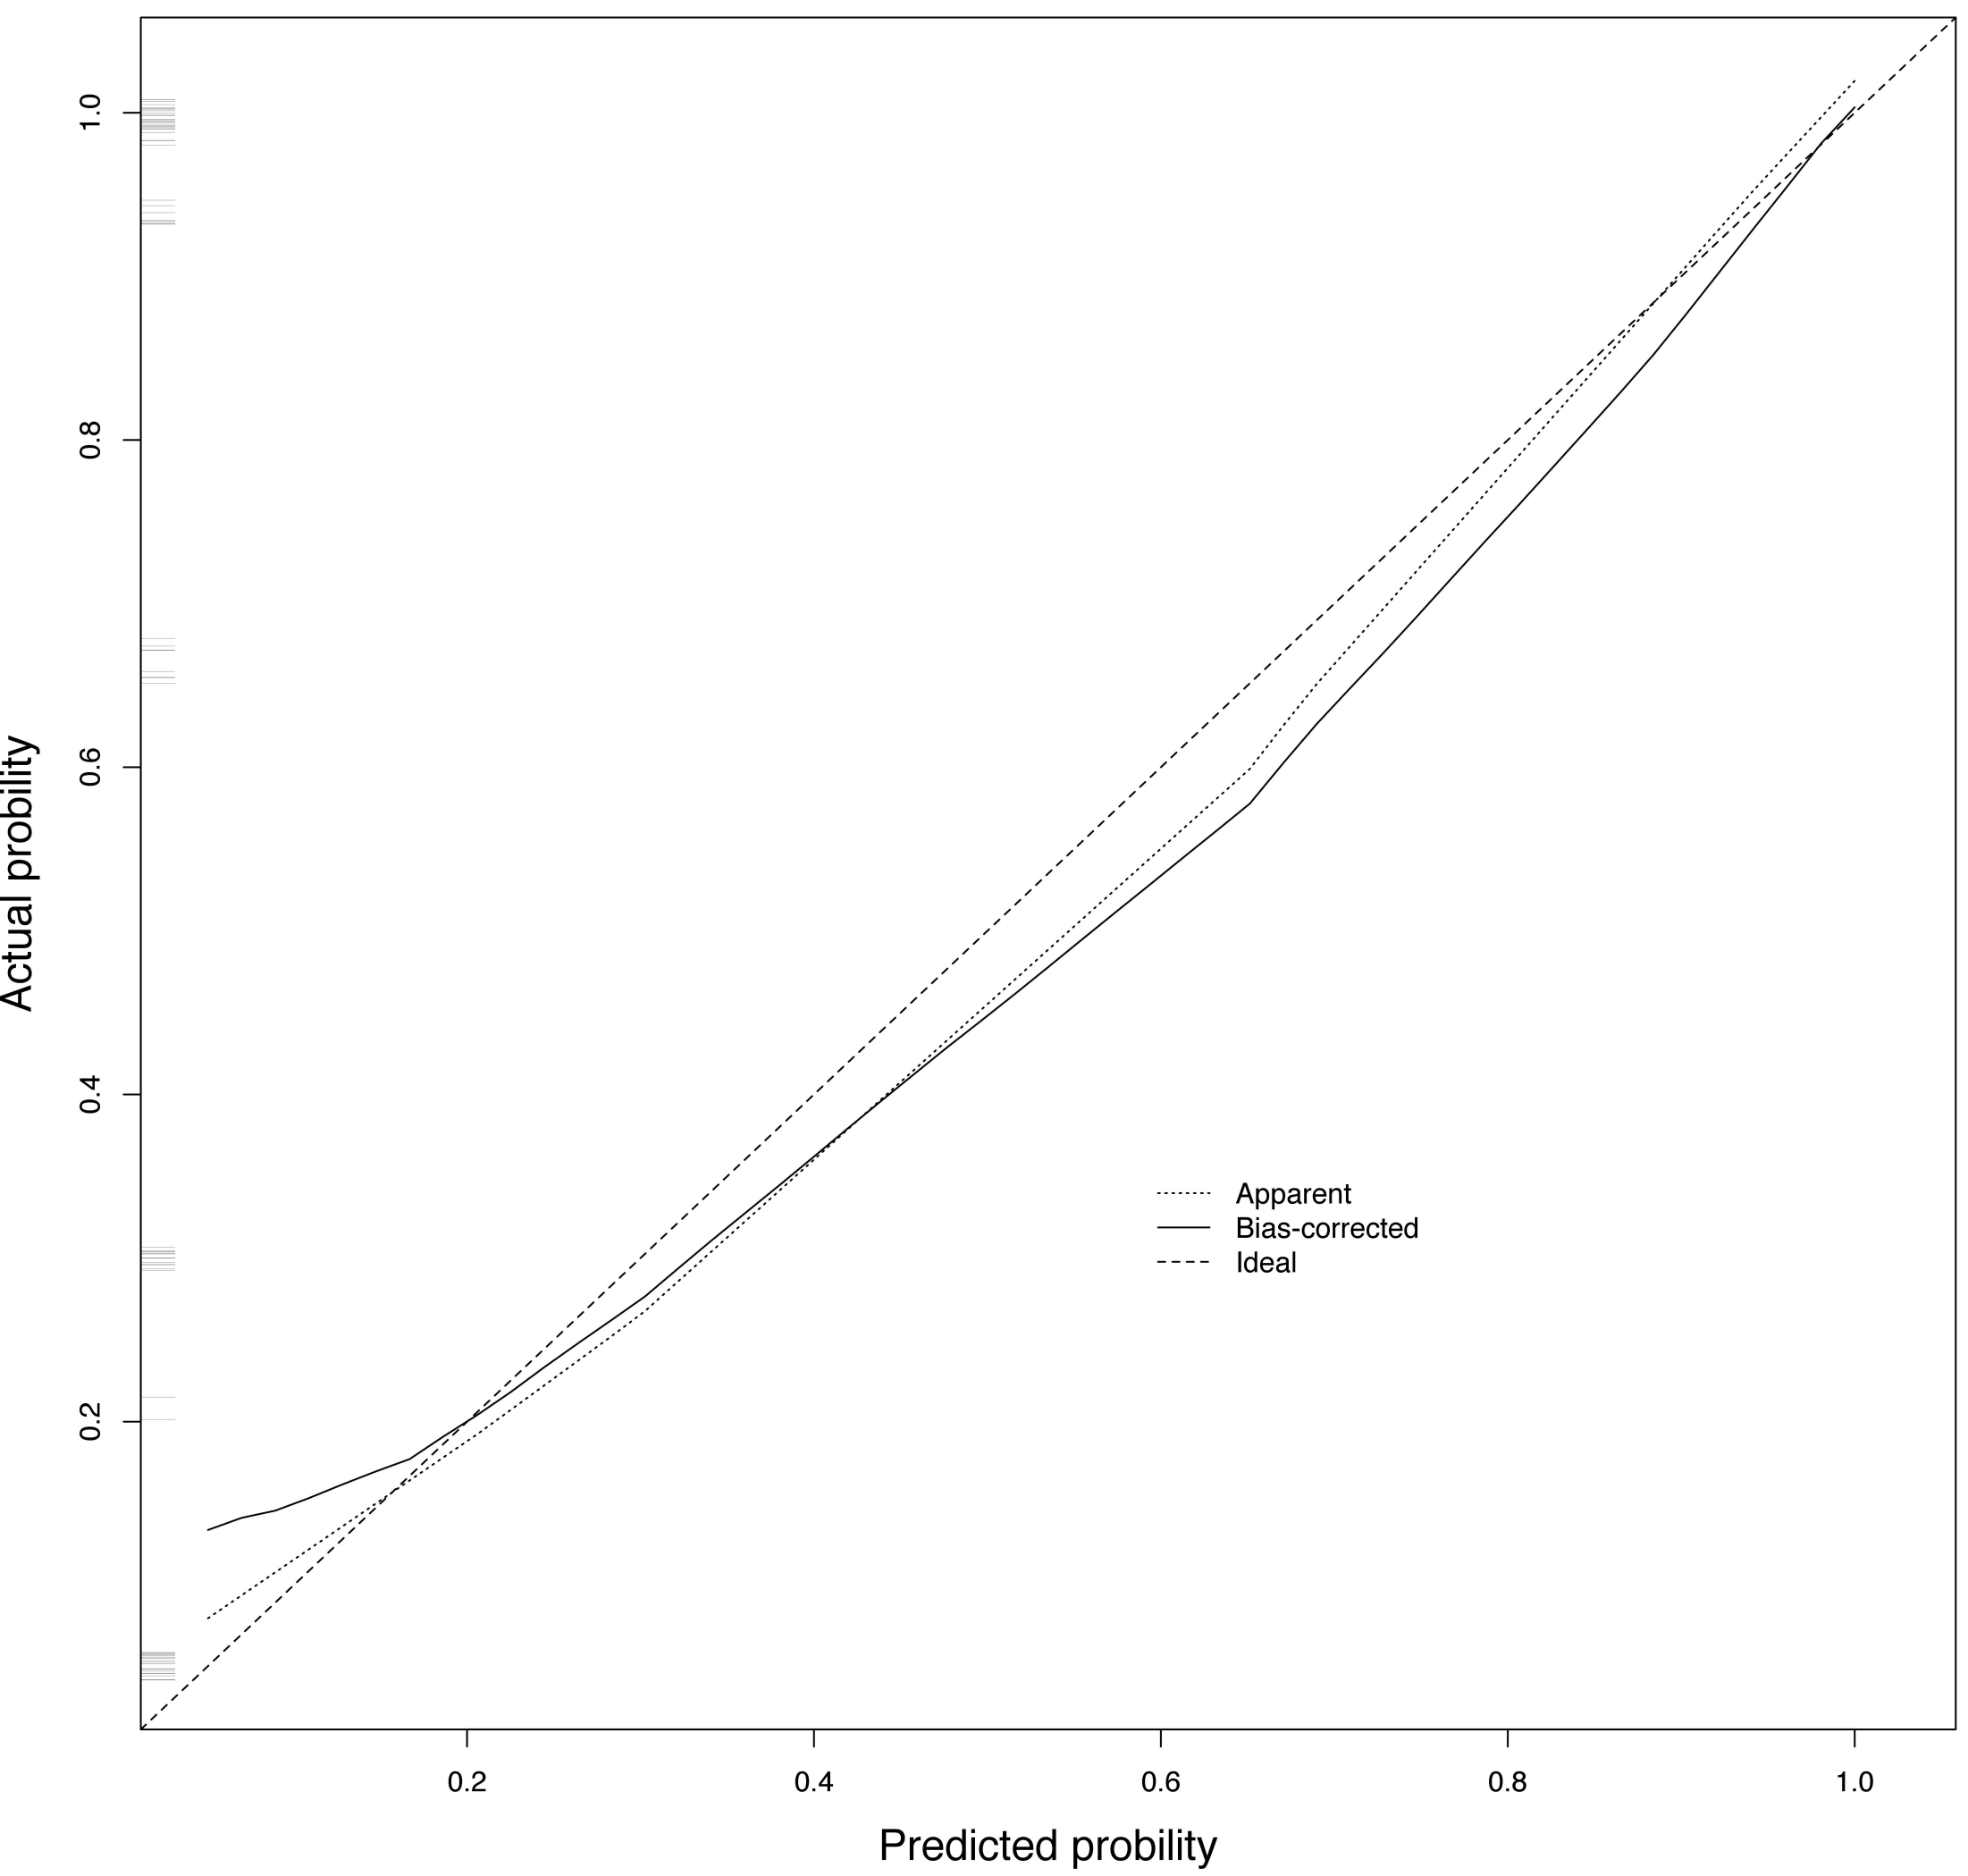

Supplement: MOESM3 [file 9512494]
